# Supplementary material for: Tunable hierarchical macro/mesoporous gold microwires fabricated by dual-templating and dealloying processes
Source: Royal Society of Chemistry journal article supplement (doi:10.1039/c3nr02940a), 2013-01-01
Supplement: c3nr02940a.pdf [file c3nr02940a.pdf]

## Supplement Information

### Tunable Hierarchical Macro/Mesoporous Gold Microwires Fabricated by a Dual Templating Approach and Dealloying Processes

Sirilak Sattayasamitsathit,<sup>a</sup> Yonge Gu,<sup>a</sup> Kevin Kaufmann,<sup>a</sup> Shelley Minter,<sup>b</sup> Ronen Polsky,<sup>c</sup>  
Joseph Wang<sup>\*a</sup>

<sup>a</sup>Department of Nanoengineering, University of California, San Diego, La Jolla, CA, 92093 USA. E-mail: josephwang@ucsd.edu

<sup>b</sup>Department of Chemistry and Materials Science and Engineering, University of Utah, Salt Lake City, UT 84112 USA.

<sup>c</sup>Sandia National Laboratories, Department of Biosensors and Nanomaterials, PO Box 5800, Albuquerque, NM 87185 USA.

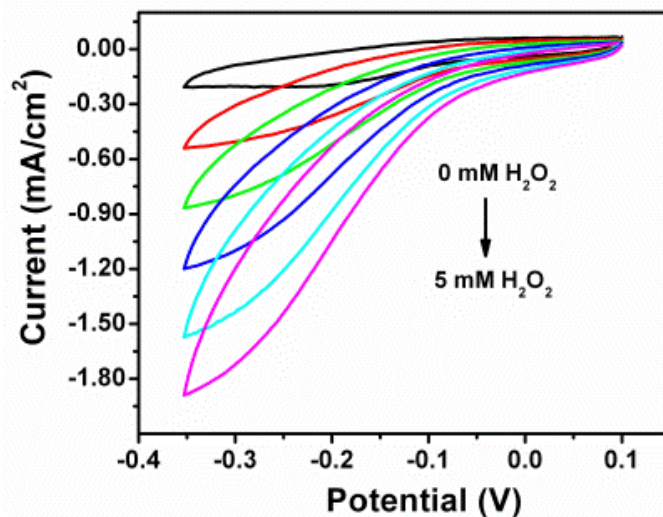

**Figure S1** CVs of  $\text{H}_2\text{O}_2$  at macro/mesoporous gold wires showing the relation of the increment  $\text{H}_2\text{O}_2$  concentrations and signal. The macro/mesoporous gold wires were fabricated the same as in Figure 3C.

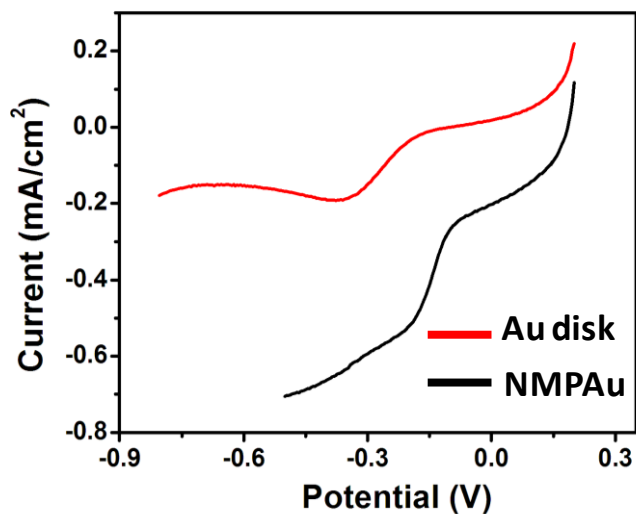

**Figure S2** The Polarization curves of the ORR at macro/mesoporous gold wires (Black) and Au disk electrode (Red) in an O<sub>2</sub>-saturated 0.5 M KOH solution at a scan rate 10 mV s<sup>-1</sup>.

**Table 1** Comparison of electroactive surface area obtained from different preparation conditions of macro/mesoporous gold structures in N<sub>2</sub>-saturated 0.5 M H<sub>2</sub>SO<sub>4</sub>.

| Prepared conditions              | ECSA (cm <sup>2</sup> ) |
|----------------------------------|-------------------------|
| <b>Dealloying times (min)</b>    |                         |
| 30                               | 27.7±2.2                |
| 60                               | 28.2±2.8                |
| 180                              | 29.4±1.8                |
| <b>Au/Ag ratios (% v/v)</b>      |                         |
| 80/20                            | 20.2±2.0                |
| 85/15                            | 27.7±2.1                |
| 90/10                            | 12.1±1.5                |
| <b>Size of PS particles (nm)</b> |                         |
| 200                              | 27.7±1.8                |
| 500                              | 23.2±2.6                |
